# Supplementary material for: Preying on seals pushes killer whales from Norway above pollution effects thresholds
Source: Springer Nature journal article supplement (doi:10.1038/s41598-020-68659-y), 2020-07-17
Supplement: 41598_2020_68659_MOESM1_ESM.pdf [file 41598_2020_68659_MOESM1_ESM.pdf]

Supplementary Information for:

# Preying on seals pushes killer whales from Norway above pollution effects thresholds

Clare Andvik<sup>1</sup>, Eve Jourdain<sup>2</sup>, Anders Ruus<sup>1,3</sup>, Jan L. Lyche<sup>4</sup>, Richard Karoliussen<sup>2</sup>, Katrine Borgå<sup>1\*</sup>

<sup>1</sup> Department of Biosciences, University of Oslo, NO-0316 Oslo, Norway.

<sup>2</sup> Norwegian Orca Survey, Daniel Olaisensvei 6, NO-8480 Andenes, Norway.

<sup>3</sup> Norwegian Institute of Water Research, Gaustadalléen 21, NO-0349 Oslo, Norway

<sup>4</sup> Department of Food Safety and Infection Biology, Norwegian University of Life Sciences, P.O. Box 5003, Campus Adamstuen, NO-1432 Ås, Norway

\*Correspondence to: [katrine.borga@ibv.uio.no](mailto:katrine.borga@ibv.uio.no)

### Supplementary Figure S1:

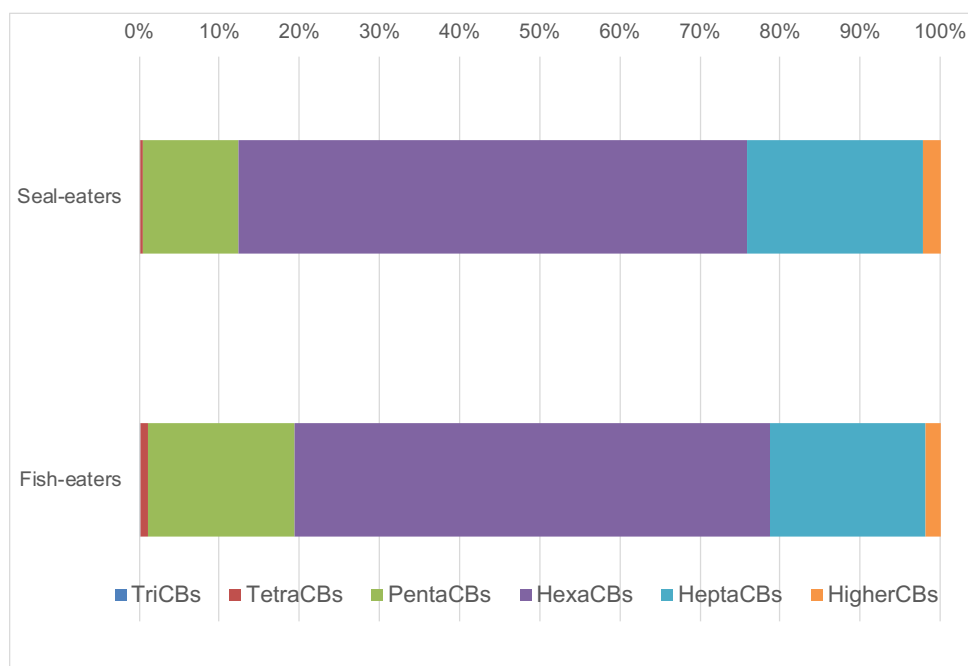

Relative contribution (%) of each homologue group of polychlorinated biphenyls (PCBs), defined according to number of chlorines, to the total PCB load ( $\Sigma$ PCBs) in the blubber of two dietary groups of killer whale (*Orcinus orca*) collected July 2017–July 2018 in northern Norway. Seal-eaters:  $n = 7$ ; fish-eaters:  $n = 24$ ).  $\Sigma$ PCBs is defined as the sum of PCB congeners detected in over 65% of whale samples: PCB-28, -66, -74, -87, -99, -101, -105, -110, -114, -118, -128, -137, -138, -141, -149, -151, -153, -156-, 157, 170, -180, -183, -187, -189, 194, -196, -206, -209

## Supplementary Methods: Organohalogen contaminant method

Approximately 0.5 g of killer whale blubber was spiked with internal standards: PCB-29, -112 and -207 (Ultra Scientific, North Kingstown, RI), BDE-77, -119, -181 and -[<sup>13</sup>C<sub>12</sub>]-209 (Cambridge Isotope Laboratories, Tewksbury, MA) and 4'-OH-[<sup>13</sup>C<sub>12</sub>]-CB-159 and 4-OH-[<sup>13</sup>C<sub>12</sub>]-CB-187 (Wellington Laboratories Inc., Guelph, Canada), homogenised using an Ultra Turrax® (IKA T25, Labortechnik, Wasserburg, Germany), and the sample homogenate extracted twice using cyclohexane and acetone. The supernatants from each step were combined, and 20% of the combined supernatant aliquoted into a vial for gravimetric lipid determination to calculate lipid %. Sample extracts were cleaned with concentrated sulphuric acid to remove fat and lipid residues. OH-metabolites were extracted using potassium hydroxide and sulphuric acid, and peak-tailing during gas chromatography (GC) prevented by replacing hydroxyl groups with acetyl groups using 1:1 pyridine: acetic anhydride. Sample extracts were evaporated and quantitatively transferred to GC glasses, and OCs, BFRs and OH-metabolites analysed separately. Instrumental methods and equipment set-up has been described previously,<sup>46,48</sup> with the following modifications: in quantifying OCs the constant flow of the hydrogen carrier gas was increased to 1.3 mL/min. and the final holding time at 275 °C was increased to 12 min, making the total run time 71.6 min.

The laboratory is accredited by the Norwegian Accreditation for the determination of OCs and BFRs in biological matrices of animal origin according to the requirements of NS-EN ISO/IEC 17025:2005 (Test 137). The laboratory is accredited for all analytes in the present study with the following exceptions: BDE-196, -202, -206, -207, -208, -209, PBT, PBEB, DPTE, HBB and OH-metabolites of PCBs and PBDEs. The method for determining non-accredited analytes was performed and validated following the same principles as the accredited standard (NS- EN ISO/IEC 17025).

**Supplementary Data** is raw data provided in a separate excel file

**Supplementary Table S1.** Summary of pollutant datasets used in statistical analyses. Pollutants were considered if they were detected in 65% or more of the whale blubber samples analysed.

|                                                | <b>Pollutant group</b>     | <b>Included</b>                                                                                                                                                      | <b>Excluded</b>                                                                                                                                                                          |
|------------------------------------------------|----------------------------|----------------------------------------------------------------------------------------------------------------------------------------------------------------------|------------------------------------------------------------------------------------------------------------------------------------------------------------------------------------------|
| <b>OHCs (Lipophilic)<br/>n = 31</b>            | PCBs<br>(N = 34)           | PCB-28, -66, -74, -87, -99, -101, -105, -110, -114, -118, -128, -137, -138, -141, -149, -151, -153, -156, -157, -170, -180, -183, -187, -189, -194, -196, -206, -209 | PCB-31, -47, -52, -56, -136, -199                                                                                                                                                        |
|                                                | OCPs<br>(N = 15)           | p,p'-DDT, p,p'-DDD, p,p'-DDE, HCB, $\beta$ -HCH, oxychlordane, <i>trans</i> -chlordane, <i>cis</i> -chlordane, <i>trans</i> -nonachlor, <i>cis</i> -nonachlor, Mirex | o,p'-DDT, o,p'-DDD, $\alpha$ -HCH, $\gamma$ -HCH                                                                                                                                         |
|                                                | BFRs<br>(N = 18)           | BDE-28, -47, -99, -100, -153, -154, HBB                                                                                                                              | BDE-183, -196, -202, -206, -207, -208, -209, HBCDD, PBT, PBEB, DPTE                                                                                                                      |
|                                                | OH-metabolites<br>(N = 16) | 4'-OH-BDE49                                                                                                                                                          | 4'-OH-PCB106, 4-OH-PCB107, 4'-OH-PCB108, 3-OH-PCB118, 4'-OH-PCB130, 3'-OH-PCB138, 4-OH-PCB146, 4'-OH-PCB159, 4'-OH-PCB172, 3'-OH-PCB180, 4-OH-PCB187, 4-OH-BDE42, 3-OH-BDE47, 6-OH-BDE47 |
| <b>Mercury (Protein-associated)<br/>n = 38</b> | Total mercury<br>(N = 1)   | Total mercury                                                                                                                                                        |                                                                                                                                                                                          |

**Supplementary Table S2.** Summary abbreviations, IUPAC name, limit of detection, recovery, and % found in all whale samples for all organohalogen contaminants analysed

| <b>Pollutant abbreviation</b> | <b>IUPAC name</b>                                            | <b>Limit of detection</b> | <b>Recovery</b> | <b>% found in whales</b> |
|-------------------------------|--------------------------------------------------------------|---------------------------|-----------------|--------------------------|
| PCB-28                        | 2,4-dichloro-1-(4-chlorophenyl)benzene                       | 0.44                      | 102             | 67.7                     |
| PCB-31                        | 1,4-dichloro-2-(4-chlorophenyl)benzene                       | 0.44                      | 97              | 0                        |
| PCB-47                        | 2,4-dichloro-1-(2,4-dichlorophenyl)benzene                   | 11.10                     | 106             | 45.1                     |
| PCB-52                        | 1,4-dichloro-2-(2,5-dichlorophenyl)benzene                   | 8.83                      | 107             | 61.2                     |
| PCB-56                        | 1,2-dichloro-3-(3,4-dichlorophenyl)benzene                   | 1.33                      | 101             | 0                        |
| PCB-66                        | 1,2-dichloro-4-(2,4-dichlorophenyl)benzene                   | 0.80                      | 99              | 83.8                     |
| PCB-74                        | 1,2,4-trichloro-5-(4-chlorophenyl)benzene                    | 1.68                      | 98              | 87                       |
| PCB-87                        | 1,2,3-trichloro-4-(2,5-dichlorophenyl)benzene                | 1.42                      | 102             | 80.6                     |
| PCB-99                        | 1,2,4-trichloro-5-(2,4-dichlorophenyl)benzene                | 2.83                      | 102             | 100                      |
| PCB-101                       | 1,2,4-trichloro-5-(2,5-dichlorophenyl)benzene                | 2.30                      | 100             | 96.8                     |
| PCB-105                       | 1,2,3-trichloro-4-(3,4-dichlorophenyl)benzene                | 0.45                      | 102             | 100                      |
| PCB-110                       | 1,2,4-trichloro-3-(3,4-dichlorophenyl)benzene                | 1.60                      | 102             | 77.4                     |
| PCB-114                       | 1,2,3,4-tetrachloro-5-(4-chlorophenyl)benzene                | 0.45                      | 103             | 77.4                     |
| PCB-118                       | 1,2,4-trichloro-5-(3,4-dichlorophenyl)benzene                | 0.45                      | 102             | 96.8                     |
| PCB-128                       | 1,2,3-trichloro-4-(2,3,4-trichlorophenyl)benzene             | 0.45                      | 102             | 100                      |
| PCB-136                       | 1,2,4-trichloro-3-(2,3,6-trichlorophenyl)benzene             | 6.90                      | 102             | 54.8                     |
| PCB-137                       | 1,2,3,4-tetrachloro-5-(2,4-dichlorophenyl)benzene            | 0.45                      | 104             | 100                      |
| PCB-138                       | 1,2,3-trichloro-4-(2,4,5-trichlorophenyl)benzene             | 0.71                      | 101             | 100                      |
| PCB-141                       | 1,2,3,4-tetrachloro-5-(2,5-dichlorophenyl)benzene            | 0.45                      | 104             | 87                       |
| PCB-149                       | 1,2,4-trichloro-3-(2,4,5-trichlorophenyl)benzene             | 0.89                      | 100             | 96.8                     |
| PCB-151                       | 1,2,4,5-tetrachloro-3-(2,5-dichlorophenyl)benzene            | 0.45                      | 102             | 96.8                     |
| PCB-153                       | 1,2,4-trichloro-5-(2,4,5-trichlorophenyl)benzene             | 0.71                      | 101             | 100                      |
| PCB-156                       | 1,2,3,4-tetrachloro-5-(3,4-dichlorophenyl)benzene            | 0.53                      | 103             | 96.8                     |
| PCB-157                       | 1,2,3-trichloro-4-(3,4,5-trichlorophenyl)benzene             | 0.45                      | 103             | 96.8                     |
| PCB-170                       | 1,2,3,4-tetrachloro-5-(2,3,4-trichlorophenyl)benzene         | 0.45                      | 101             | 100                      |
| PCB-180                       | 1,2,3,4-tetrachloro-5-(2,4,5-trichlorophenyl)benzene         | 0.45                      | 101             | 100                      |
| PCB-183                       | 1,2,3,5-tetrachloro-4-(2,4,5-trichlorophenyl)benzene         | 0.45                      | 104             | 100                      |
| PCB-187                       | 1,2,4,5-tetrachloro-3-(2,4,5-trichlorophenyl)benzene         | 0.45                      | 103             | 100                      |
| PCB-189                       | 1,2,3,4-tetrachloro-5-(3,4,5-trichlorophenyl)benzene         | 0.45                      | 101             | 83.8                     |
| PCB-194                       | 1,2,3,4-tetrachloro-5-(2,3,4,5-tetrachlorophenyl)benzene     | 0.45                      | 103             | 100                      |
| PCB-196                       | 1,2,3,4-tetrachloro-5-(2,3,4,6-tetrachlorophenyl)benzene     | 0.45                      | 100             | 100                      |
| PCB-199                       | 1,2,3,4-tetrachloro-5-(2,3,5,6-tetrachlorophenyl)benzene     | 0.45                      | 101             | 51.6                     |
| PCB-206                       | 1,2,3,4,5-pentachloro-6-(2,3,4,5-tetrachlorophenyl)benzene   | 0.45                      | 101             | 83.8                     |
| PCB-209                       | 1,2,3,4,5-pentachloro-6-(2,3,4,5,6-pentachlorophenyl)benzene | 0.40                      | 97              | 93.5                     |
| HCB                           | 1,2,3,4,5,6-hexachlorobenzene                                | 0.45                      | 106             | 100                      |

|                        |                                                                                                                                                    |       |     |       |
|------------------------|----------------------------------------------------------------------------------------------------------------------------------------------------|-------|-----|-------|
| $\alpha$ -HCH          | $\alpha$ -1,2,3,4,5,6-hexachlorocyclohexane                                                                                                        | 0.90  | 103 | 9.6   |
| $\beta$ -HCH           | $\beta$ -1,2,3,4,5,6-hexachlorocyclohexane                                                                                                         | 1.24  | 100 | 74.1  |
| $\gamma$ -HCH          | $\gamma$ -1,2,3,4,5,6-hexachlorocyclohexane                                                                                                        | 1.15  | 103 | 3.3   |
| Oksyklordan            | 1,5,6,8,9,10,11,11-octachloro-4-oxatetracyclo[6.2.1.0 <sup>2,7</sup> .0 <sup>3,5</sup> ]undec-9-ene                                                | 0.45  | 65  | 100   |
| <i>trans</i> -Klordan  | (1 <i>S</i> ,2 <i>S</i> ,3 <i>R</i> ,4 <i>R</i> ,6 <i>S</i> ,7 <i>R</i> )-1,3,4,7,8,9,10,10-octachlorotricyclo[5.2.1.0 <sup>2,6</sup> ]dec-8-ene   | 0.45  | 109 | 83.8  |
| <i>cis</i> -Klordan    | (1 <i>R</i> ,2 <i>R</i> ,3 <i>R</i> ,4 <i>S</i> ,6 <i>S</i> ,7 <i>S</i> )-1,3,4,7,8,9,10,10-octachlorotricyclo[5.2.1.0 <sup>2,6</sup> ]dec-8-ene   | 0.45  | 108 | 96.7  |
| <i>trans</i> -Nonaklor | (1 <i>S</i> ,2 <i>R</i> ,3 <i>S</i> ,5 <i>R</i> ,6 <i>S</i> ,7 <i>R</i> )-1,3,4,5,7,8,9,10,10-nonachlorotricyclo[5.2.1.0 <sup>2,6</sup> ]dec-8-ene | 0.45  | 108 | 100   |
| <i>cis</i> -Nonaklor   | (1 <i>S</i> ,2 <i>R</i> ,3 <i>R</i> ,5 <i>S</i> ,6 <i>R</i> ,7 <i>R</i> )-1,3,4,5,7,8,9,10,10-nonachlorotricyclo[5.2.1.0 <sup>2,6</sup> ]dec-8-ene | 0.45  | 104 | 93.5  |
| <i>p,p'</i> -DDE       | 1-chloro-4-[2,2,2-trichloro-1-(4-chlorophenyl)ethyl]benzene                                                                                        | 4.24  | 103 | 100   |
| <i>o,p'</i> -DDD       | 1-chloro-2-[2,2,2-trichloro-1-(4-chlorophenyl)ethyl]benzene                                                                                        | 2.30  | 109 | 51.6  |
| <i>p,p'</i> -DDD       | 1-chloro-2-[2,2-dichloro-1-(4-chlorophenyl)ethyl]benzene                                                                                           | 8.22  | 104 | 87    |
| <i>o,p'</i> -DDT       | 1-chloro-4-[2,2-dichloro-1-(4-chlorophenyl)ethyl]benzene                                                                                           | 6.00  | 108 | 61.2  |
| <i>p,p'</i> -DDT       | 1-chloro-4-[2,2-dichloro-1-(4-chlorophenyl)ethyl]benzene                                                                                           | 1.33  | 108 | 80.6  |
| Mirex                  | 1,2,3,4,5,5,6,7,8,9,10,10-dodecachloropentacyclo[5.3.0.0 <sup>2,6</sup> .0 <sup>3,9</sup> .0 <sup>4,8</sup> ]decane                                | 0.62  | 98  | 90.3  |
| BDE-28                 | 2,4-dibromo-1-(4-bromophenoxy)benzene                                                                                                              | 0.017 | 92  | 100   |
| BDE-47                 | 2,4-dibromo-1-(2,4-dibromophenoxy)benzene                                                                                                          | 0.030 | 90  | 100   |
| BDE-99                 | 1,2,4-tribromo-5-(2,4-dibromophenoxy)benzene                                                                                                       | 0.034 | 97  | 100   |
| BDE-100                | 1,3,5-tribromo-2-(2,4-dibromophenoxy)benzene                                                                                                       | 0.040 | 87  | 100   |
| BDE-153                | 1,2,4-tribromo-5-(2,4,5-tribromophenoxy)benzene                                                                                                    | 0.030 | 96  | 100   |
| BDE-154                | 1,2,4-tribromo-5-(2,4,6-tribromophenoxy)benzene                                                                                                    | 0.030 | 92  | 100   |
| BDE-183                | 1,2,3,5-tetrabromo-4-(2,4,5-tribromophenoxy)benzene                                                                                                | 0.085 | 84  | 22.58 |
| BDE-196                | 1,2,3,4-tetrabromo-5-(2,3,4,6-tetrabromophenoxy)benzene                                                                                            | 0.362 | 180 | 3.3   |
| BDE-202                | 1,2,4,5-tetrabromo-3-(2,3,5,6-tetrabromophenoxy)benzene                                                                                            | 0.030 | 216 | 45.1  |
| BDE-206                | 1,2,3,4,5-pentabromo-6-(2,3,4,5-tetrabromophenoxy)benzene                                                                                          | 0.110 | 117 | 16.12 |
| BDE-207                | 1,2,3,4,5-pentabromo-6-(2,3,4,6-tetrabromophenoxy)benzene                                                                                          | 0.055 | 126 | 19.3  |
| BDE-208                | 1,2,3,4,5-pentabromo-6-(2,3,5,6-tetrabromophenoxy)benzene                                                                                          | 0.063 | 115 | 3.3   |
| BDE-209                | 1,2,3,4,5-pentabromo-6-(2,3,4,5,6-pentabromophenoxy)benzene                                                                                        | 0.030 | 100 | 25.8  |
| HBCDD                  | 1,2,5,6,9,10-hexabromocyclododecane                                                                                                                | 0.122 | 54  | 58    |
| PBT                    | 1,2,3,4,5-pentabromo-6-methylbenzene                                                                                                               | 0.012 | 94  | 58    |
| PBEB                   | 1,2,3,4,5-pentabromo-6-ethylbenzene                                                                                                                | 0.014 | 92  | 3.2   |
| DPTE                   | (1,3,5-tribromo-2-(2,3 dibromopropoxy)benzene                                                                                                      | 0.027 | 95  | 0     |
| HBB                    | 1,2,3,4,5,6-hexabromobenzene                                                                                                                       | 0.017 | 94  | 100   |
| 4'-OH-CB106            | 4'-OH-2',3,3',4',5'-pentachlorobiphenyl                                                                                                            | 0.018 | 63  | 3.2   |
| 4-OH-CB107             | 4-OH-2,3,3',4',5'-pentachlorobiphenyl                                                                                                              | 0.022 | 103 | 22.6  |
| 4'-OH-CB108            | 4'-OH-2',3,3',4',5'-pentachlorobiphenyl                                                                                                            | 0.022 | 100 | 6.45  |
| 3-OH-CB118             | 3-OH-2,3',4,4',5'-pentachlorobiphenyl                                                                                                              | 0.027 | 115 | 3.2   |
| 4'-OH-CB130            | 4'-OH-2,2',3,3',4',5'-hexachlorobiphenyl                                                                                                           | 0.027 | 104 | 0     |
| 3'-OH-CB138            | 3'-OH-2,2',3',4,4',5'-hexachlorobiphenyl                                                                                                           | 0.036 | 105 | 0     |

|             |                                              |       |     |      |
|-------------|----------------------------------------------|-------|-----|------|
| 4-OH-CB146  | 4-OH-2,2',3,4',5,5'- hexachlorobiphenyl      | 0.022 | 102 | 0    |
| 4'-OH-CB159 | 4'-OH-2',3,3',4',5,5'- hexachlorobiphenyl    | 0.013 | 93  | 9.6  |
| 4'-OH-CB172 | 4'-OH-2,2',3,3',4',5,5'- heptachlorobiphenyl | 0.013 | 86  | 0    |
| 3'-OH-CB180 | 3'-OH-2,2',3',4,4',5,5'- heptachlorobiphenyl | 0.013 | 84  | 0    |
| 4-OH-CB187  | 4-OH-2,2',3,4',5,5',6- heptachlorobiphenyl   | 0.027 | 77  | 6.45 |
| 4-OH-BDE42  | 4-OH-2,2',3,4'-tetrabromodiphenyl ether      | 0.040 | 47  | 3.2  |
| 3-OH-BDE47  | 3-OH-2,2',4,4'-tetrabromodiphenyl ether      | 0.027 | 61  | 3.2  |
| 6-OH-BDE47  | 6-OH-2,2',4,4'-tetrabromodiphenyl ether      | 0.027 | 107 | 45.1 |
| 4'-OH-BDE49 | 4'-OH-2,2',4,5'-tetrabromodiphenyl ether     | 0.040 | 82  | 83.8 |
| 2'-OH-BDE68 | 2'-OH-2,3',4,5'-tetrabromodiphenyl ether     | 0.027 | 91  | 6.45 |



**Supplementary Table S3:** Summary of lipid-normalised concentrations ( $\mu\text{g/g}$ ) of organohalogen contaminants expressed in all sampled killer

whales ( $n = 31$ )

| OHC group                 |                     | Seal-eaters                                            |                                                        |                                                        |                              | Fish-eaters                                             |                                                         |                                                        |                                  |                                                          |                                                          |
|---------------------------|---------------------|--------------------------------------------------------|--------------------------------------------------------|--------------------------------------------------------|------------------------------|---------------------------------------------------------|---------------------------------------------------------|--------------------------------------------------------|----------------------------------|----------------------------------------------------------|----------------------------------------------------------|
|                           |                     | All ( $n = 7$ )                                        | Adult male ( $n = 4$ )                                 | Adult female ( $n = 2$ )                               | UNK <sup>f</sup> ( $n = 1$ ) | All ( $n = 24$ )                                        | Adult male ( $n = 17$ )                                 | Adult female ( $n = 2$ )                               | SA <sup>g</sup> male ( $n = 1$ ) | SA <sup>g</sup> UNK ( $n = 2$ )                          | UNK ( $n = 2$ )                                          |
| <b>ΣPCBs<sup>a</sup></b>  | $\mu \pm \text{SD}$ | 56.0 ± 37.8                                            | 58.9 ± 35.9                                            | 64.6 ± 60.6                                            | 26.9                         | 16.7 ± 18.3                                             | 20.7 ± 20.4                                             | 4.07 ± 2.52                                            | 6.87                             | 6.59 ± 3.53                                              | 10.6 ± 9.34                                              |
|                           | Geometric mean      | 45.7                                                   | 50.7                                                   | 48.4                                                   |                              | 10.9                                                    | 14.2                                                    | 3.66                                                   |                                  | 6.10                                                     | 8.30                                                     |
|                           | Median (range)      | 48.2 (21.8–108)                                        | 53.0 (22.0–108)                                        | 64.6 (21.8–107)                                        |                              | 9.52 (2.3–77.1)                                         | 12.0 (4.03–77.1)                                        | 4.07 (2.3–5.85)                                        |                                  | 6.59 (4.09–9.08)                                         | 10.6 (3.96–17.2)                                         |
| <b>ΣDDTs<sup>b</sup></b>  | $\mu \pm \text{SD}$ | 28.3 ± 21.1                                            | 30.9 ± 16.7                                            | 32.9 ± 37.2                                            | 8.70                         | 15.3 ± 21.4                                             | 19.3 ± 20.4                                             | 2.49 ± 1.64                                            | 4.60                             | 5.73 ± 3.78                                              | 9.39 ± 9.03                                              |
|                           | Geometric mean      | 21.4                                                   | 27.7                                                   | 19.9                                                   |                              | 8.59                                                    | 11.4                                                    | 2.20                                                   |                                  | 5.06                                                     | 6.88                                                     |
|                           | Median (range)      | 26.8 (6.67–59.2)                                       | 27.5 (14.4–54.2)                                       | 32.9 (6.67–59.2)                                       |                              | 7.79 (1.33–100)                                         | 8.96 (3.04–100)                                         | 2.49 (1.33–3.65)                                       |                                  | 5.73 (3.05–8.40)                                         | 9.39 (3.00–15.8)                                         |
| <b>ΣCHLs<sup>c</sup></b>  | $\mu \pm \text{SD}$ | 9.78 ± 5.59                                            | 10.3 ± 3.75                                            | 11.6 ± 10.2                                            | 4.06                         | 4.35 ± 5.01                                             | 5.31 ± 5.65                                             | 1.17 ± 0.964                                           | 1.99                             | 1.65 ± 0.874                                             | 3.31 ± 2.40                                              |
|                           | Geometric mean      | 8.41                                                   | 9.69                                                   | 9.13                                                   |                              | 2.98                                                    | 3.80                                                    | 0.952                                                  |                                  | 1.53                                                     | 2.84                                                     |
|                           | Median (range)      | 9.46 (4.06–18.9)                                       | 10.6 (5.54–14.4)                                       | 11.7 (4.41–18.9)                                       |                              | 2.67 (0.489–23.4)                                       | 3.06 (1.52–23.4)                                        | 1.17 (0.489–1.85)                                      |                                  | 1.65 (1.03–2.26)                                         | 3.31 (1.61–5.01)                                         |
| <b>HCB</b>                | $\mu \pm \text{SD}$ | 0.523 ± 0.467                                          | 0.389 ± 0.309                                          | 0.893 ± 0.824                                          | 0.357                        | 0.205 ± 0.0903                                          | 0.229 ± 0.0934                                          | 0.105 ± 0.0570                                         | 0.160                            | 0.260 ± 0.0443                                           | 0.186 ± 0.006                                            |
|                           | Geometric mean      | 0.401                                                  | 0.324                                                  | 0.650                                                  |                              | 0.189                                                   | 0.216                                                   | 0.0973                                                 |                                  | 0.132                                                    | 0.186                                                    |
|                           | Median (range)      | 0.290 (0.220–0.146)                                    | 0.242 (0.220–0.852)                                    | 0.873 (0.290–1.45)                                     |                              | 0.178 (0.0649–0.519)                                    | 0.194 (0.126–0.519)                                     | 0.105 (0.0649–0.146)                                   |                                  | 0.260 (0.105–0.167)                                      | 0.186 (0.190–0.182)                                      |
| <b>β-HCH</b>              | $\mu \pm \text{SD}$ | 0.116 ± 0.090                                          | 0.0974 ± 0.0692                                        | 0.179 ± 0.149                                          | 0.0605                       | 0.0470 ± 0.0369                                         | 0.0546 ± 0.0935                                         | 0.0186 ± 0.0164                                        | 0.0164                           | 0.0260 ± 0.00964                                         | 0.0476 ± 0.0167                                          |
|                           | Geometric mean      | 0.0929                                                 | 0.0827                                                 | 0.145                                                  |                              | 0.0378                                                  | 0.0456                                                  | 0.0146                                                 |                                  | 0.0251                                                   | 0.0461                                                   |
|                           | Median (range)      | 0.0739 (0.0426–0.284)                                  | 0.074 (0.0426–0.199)                                   | 0.179 (0.0739–0.284)                                   |                              | 0.0311 (<LOD–0.193)                                     | 0.0513 (<LOD–0.193)                                     | 0.0186 (<LOD–0.030)                                    |                                  | 0.0260 (<LOD–0.0328)                                     | 0.0476 (<LOD–0.0593)                                     |
| <b>Mirex</b>              | $\mu \pm \text{SD}$ | 0.295 ± 0.148                                          | 0.256 ± 0.179                                          | 0.400 ± 0.065                                          | 0.237                        | 0.0700 ± 0.0777                                         | 0.0842 ± 0.0879                                         | 0.0384 ± 0.00479                                       | 0.0318                           | 0.0407 ± 0.0158                                          | 0.0292 ± 0.0386                                          |
|                           | Geometric mean      | 0.224                                                  | 0.166                                                  | 0.398                                                  |                              | 0.0425                                                  | 0.0522                                                  | 0.383                                                  |                                  | 0.0391                                                   | 0.0104                                                   |
|                           | Median (range)      | 0.347 (<LOD–0.446)                                     | 0.283 (<LOD–0.437)                                     | 0.400 (0.354–0.446)                                    |                              | 0.0449 (<LOD–0.350)                                     | 0.0478 (<LOD–0.304)                                     | 0.0384 (<LOD–0.0417)                                   |                                  | 0.0407 (<LOD–0.0158)                                     | 0.0292 (<LOD–0.0565)                                     |
| <b>ΣPBDEs<sup>d</sup></b> | $\mu \pm \text{SD}$ | 1.57 ± 0.73                                            | 1.61 ± 0.39                                            | 1.67 ± 1.61                                            | 1.21                         | 0.554 ± 0.415                                           | 0.491 ± 0.444                                           | 0.218 ± 0.172                                          | 0.275                            | 0.284 ± 0.182                                            | 0.482 ± 0.364                                            |
|                           | Geometric mean      | 1.41                                                   | 1.58                                                   | 1.22                                                   |                              | 0.447                                                   | 0.553                                                   | 0.180                                                  |                                  | 0.253                                                    | 0.407                                                    |
|                           | Median (range)      | 1.38 (0.529–2.81)                                      | 1.51 (1.27–2.13)                                       | 1.67 (0.529–2.81)                                      |                              | 0.466 (0.0960–1.79)                                     | 0.491 (0.258–1.79)                                      | 0.218 (0.0960–0.339)                                   |                                  | 0.284 (0.155–0.412)                                      | 0.482 (0.224–0.739)                                      |
| <b>HBB</b>                | $\mu \pm \text{SD}$ | (9.04 ± 2.81) × 10 <sup>-3</sup>                       | (9.15 ± 3.61) × 10 <sup>-3</sup>                       | (10.1 ± 0.02) × 10 <sup>-3</sup>                       | 6.57 × 10 <sup>-3</sup>      | (2.82 ± 3.16) × 10 <sup>-3</sup>                        | (3.49 ± 3.55) × 10 <sup>-3</sup>                        | (1.55 ± 0.632) × 10 <sup>-3</sup>                      | 0.729 × 10 <sup>-3</sup>         | (0.954 ± 0.189) × 10 <sup>-3</sup>                       | (1.40 ± 1.08) × 10 <sup>-3</sup>                         |
|                           | Geometric mean      | 8.68 × 10 <sup>-3</sup>                                | 8.64 × 10 <sup>-3</sup>                                | 10.0 × 10 <sup>-3</sup>                                |                              | 1.84 × 10 <sup>-3</sup>                                 | 2.27 × 10 <sup>-3</sup>                                 | 1.48 × 10 <sup>-3</sup>                                |                                  | 0.945 × 10 <sup>-3</sup>                                 | 1.17 × 10 <sup>-3</sup>                                  |
|                           | Median (range)      | 9.49 × 10 <sup>-3</sup> (5.51–14.0) × 10 <sup>-3</sup> | 8.55 × 10 <sup>-3</sup> (5.51–14.0) × 10 <sup>-3</sup> | 10.1 × 10 <sup>-3</sup> (10.1–10.1) × 10 <sup>-3</sup> |                              | 1.90 × 10 <sup>-3</sup> (0.611–14.3) × 10 <sup>-3</sup> | 2.18 × 10 <sup>-3</sup> (0.611–14.3) × 10 <sup>-3</sup> | 1.55 × 10 <sup>-3</sup> (1.10–1.99) × 10 <sup>-3</sup> |                                  | 0.954 × 10 <sup>-3</sup> (0.821–1.08) × 10 <sup>-3</sup> | 1.40 × 10 <sup>-3</sup> (0.634–0.217) × 10 <sup>-3</sup> |

|                                            |                                   |                                                           |                                                           |                                                           |                          |                                                           |                                                           |                                                             |                           |                                                              |                                                            |
|--------------------------------------------|-----------------------------------|-----------------------------------------------------------|-----------------------------------------------------------|-----------------------------------------------------------|--------------------------|-----------------------------------------------------------|-----------------------------------------------------------|-------------------------------------------------------------|---------------------------|--------------------------------------------------------------|------------------------------------------------------------|
| <b>4'-OH-BDE49</b>                         | $\mu \pm$ SD<br>Geometric<br>mean | $(7.79 \pm 5.54) \times 10^{-3}$<br>6.20 $\times 10^{-3}$ | $(6.96 \pm 4.28) \times 10^{-3}$<br>5.83 $\times 10^{-3}$ | $(10.3 \pm 10.6) \times 10^{-3}$<br>7.07 $\times 10^{-3}$ | 6.06<br>$\times 10^{-3}$ | $(2.92 \pm 3.41) \times 10^{-3}$<br>1.45 $\times 10^{-3}$ | $(3.81 \pm 3.70) \times 10^{-3}$<br>2.20 $\times 10^{-3}$ | $(0.563 \pm 3.62) \times 10^{-3}$<br>0.464 $\times 10^{-3}$ | 0.729<br>$\times 10^{-3}$ | $(0.603 \pm 0.769) \times 10^{-3}$<br>0.261 $\times 10^{-3}$ | $(1.08 \pm 0.410) \times 10^{-3}$<br>1.05 $\times 10^{-3}$ |
|                                            | Median<br>(range)                 | 6.06 $\times 10^{-3}$<br>(2.31–17.8) $\times 10^{-3}$     | 7.27 $\times 10^{-3}$<br>(2.31–11.0) $\times 10^{-3}$     | 10.3 $\times 10^{-3}$<br>(2.80–17.8) $\times 10^{-3}$     |                          | 1.64 $\times 10^{-3}$<br>(<LOD–14.3) $\times 10^{-3}$     | 2.55 $\times 10^{-3}$<br>(<LOD–14.3) $\times 10^{-3}$     | 0.563 $\times 10^{-3}$<br>(<LOD–0.892) $\times 10^{-3}$     |                           | 0.603 $\times 10^{-3}$<br>(<LOD–1.14 $\times 10^{-3}$ )      | 1.08 $\times 10^{-3}$<br>(0.795–1.38 $\times 10^{-3}$ )    |
| <b><math>\Sigma</math>OHCS<sup>e</sup></b> | $\mu \pm$ SD<br>Geometric<br>mean | 96.6 $\pm$ 65.0<br>78.6                                   | 103 $\pm$ 56.2<br>91.0                                    | 112 $\pm$ 111<br>80.6                                     | 41.6                     | 37.3 $\pm$ 44.6<br>23.5                                   | 46.3 $\pm$ 50.2<br>30.7                                   | 8.11 $\pm$ 47.9<br>7.17                                     | 13.9                      | 14.4 $\pm$ 8.40<br>13.2                                      | 24.0 $\pm$ 21.2<br>18.8                                    |
|                                            | Median<br>(range)                 | 90.1<br>(34.1–191)                                        | 93.9<br>(43.6–178)                                        | 112<br>(34.1–191)                                         |                          | 20.5<br>(4.31–202)                                        | 24.5<br>(9.10–202)                                        | 8.11<br>(4.31–11.9)                                         |                           | 14.4<br>(8.51–20.4)                                          | 24.0<br>(9.02–38.9)                                        |

<sup>a</sup>Sum of PCB-28, -66, -74, -87, -99, -101, -105, -110, -114, -118, -128, -137, -138, -141, -149, -151, -153, -156, 157, 170, -180, -183, -187, -189, 194, -196, -206, -209. <sup>b</sup>Sum of p,p'-DDT, p,p'-DDD and p,p'-DDE. <sup>c</sup>

Sum of oxychlordan, *trans*-chlordan, *cis*-chlordan, *trans*-nonachlor and *cis*-nonachlor. <sup>d</sup>Sum of BDE-28, -47, -99, -100, -153, -154 <sup>e</sup>Sum of all organohalogen contaminants detected in more than 65% of whale

samples. <sup>f</sup>UNK = Unknown sex or age. <sup>g</sup>SA = Subadult. LOD = Limit of detection

**Supplementary Table S4:** Summary of total mercury levels in all sampled killer whales ( $n = 38$ ).

| Total mercury levels                                           |                     | Seal-eaters         |                           |                             |                                 | Fish-eaters         |                            |                             |                                     |                                    |                     |
|----------------------------------------------------------------|---------------------|---------------------|---------------------------|-----------------------------|---------------------------------|---------------------|----------------------------|-----------------------------|-------------------------------------|------------------------------------|---------------------|
|                                                                |                     | All<br>( $n = 10$ ) | Adult male<br>( $n = 5$ ) | Adult female<br>( $n = 4$ ) | UNK <sup>a</sup><br>( $n = 1$ ) | All<br>( $n = 28$ ) | Adult male<br>( $n = 20$ ) | Adult female<br>( $n = 3$ ) | SA <sup>b</sup> male<br>( $n = 1$ ) | SA <sup>b</sup> UNK<br>( $n = 2$ ) | UNK<br>( $n = 2$ )  |
| Measured<br>in skin<br>( $\mu\text{g/g d.w.}$ )                | $\mu \pm \text{SD}$ | $3.73 \pm 1.26$     | $3.52 \pm 1.66$           | $3.97 \pm 0.95$             | 3.79                            | $1.76 \pm 0.32$     | $1.78 \pm 0.27$            | $3.19 \pm 1.49$             | 1.01                                | $1.53 \pm 0.21$                    | $2.08 \pm 0.45$     |
|                                                                | Geometric mean      | 3.47                | 3.11                      | 3.87                        |                                 | 1.73                | 1.76                       | 2.98                        |                                     | 1.52                               | 2.06                |
| Estimated<br>in liver<br>( $\mu\text{g/g w.w.}$ ) <sup>c</sup> | $\mu \pm \text{SD}$ | $12.5 \pm 5.62$     | $11.6 \pm 7.1$            | $12.5 \pm 4.47$             | 16.8                            | $3.57 \pm 1.05$     | $3.68 \pm 0.987$           | $3.70 \pm 0.531$            | 1.49                                | $2.50 \pm 0.278$                   | $4.40 \pm 1.48$     |
|                                                                | Geometric mean      | 10.5                | 8.77                      | 11.8                        |                                 | 3.41                | 3.54                       | 3.68                        |                                     | 2.488                              | 4.27                |
|                                                                | Median (range)      | 3.95<br>(1.19–5.44) | 3.71<br>(1.19–5.44)       | 4.18<br>(2.62–4.88)         |                                 | 1.79<br>(1.01–2.40) | 1.83<br>(1.29–2.25)        | 2.62<br>(2.08–4.88)         |                                     | 1.53<br>(1.38–1.67)                | 2.08<br>(1.76–2.40) |
|                                                                | Median (range)      | 14.2<br>(1.78–18.5) | 14.3<br>(1.78–18.5)       | 13.2<br>(6.48–17.1)         |                                 | 3.47<br>(1.49–5.65) | 3.61<br>(1.57–5.65)        | 3.411<br>(3.38–4.31)        |                                     | 2.49<br>(2.30–2.69)                | 4.40<br>(3.34–5.45) |

<sup>a</sup>UNK = Unknown sex or age. <sup>b</sup>SA = Subadult. <sup>c</sup>Estimated using equation  $\ln(Hg_{liver}) = 1.6124 \times \ln(Hg_{skin}) + 2.0346$  based on bottlenose dolphins (*Tursiops truncatus*)<sup>58</sup>.
